# Supplementary material for: The Aversive Response of the Locust Locusta migratoria to 3-Octanone, an Odorant from Fungal Pathogens, Is Mediated by a Chemosensory Protein
Source: MDPI journal article supplement (doi:10.3390/agriculture13081542), 2023-08-02
Supplement: s1 [file s1]

**Figure S2.** EAG responses of locust antennae to different concentrations of 14 compounds. n = 11–12. Mean EAG responses to the applied doses of the same odor compound were compared by ANOVA and Tukey's HSD test ( $\alpha = 0.05$ ). \*,  $p < 0.05$ . \*\*,  $p < 0.01$ . \*\*\*,  $p < 0.001$ . \*\*\*\*,  $p < 0.0001$ .

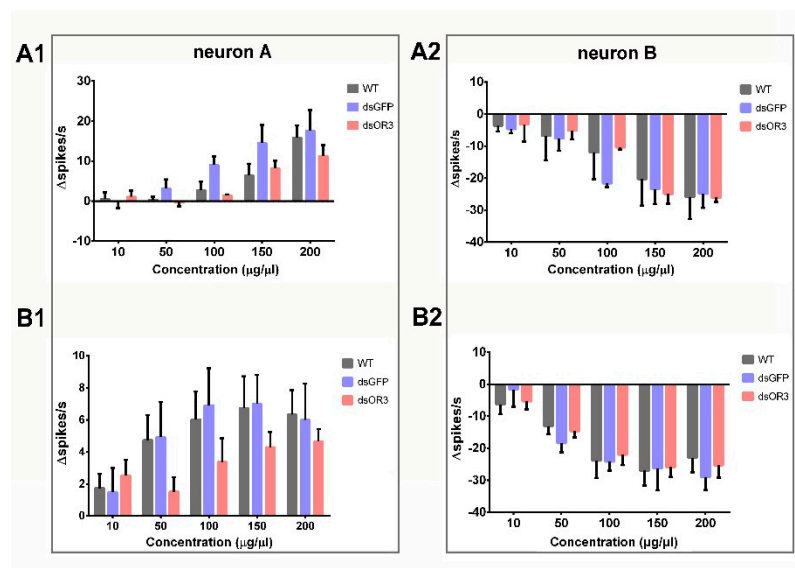

**Figure S3.** Comparison of the number of neuron A and B spikes housed in trichoid sensillum in WT, dsGFP, and dsOR3 locusts in response to 3-heptanone (A) and 3-nonanone (B) at different dosages after RNAi. (A–B): Ordinary one-way ANOVA. Tukey's multiple comparisons test. Error bar: S.E.M. n=5–9.

**Table S1.** Characteristics of all chemicals used.

| Odor name                     | CAS No.    | Solvent     | Purity |
|-------------------------------|------------|-------------|--------|
| 2,4,5-trimethyl thiazole      | 13623-11-3 | mineral oil | 98%    |
| 2,5-dimethylpyrazine          | 123-32-0   | mineral oil | 98%    |
| 2-heptanone                   | 110-43-0   | mineral oil | 98%    |
| 2-isobutylthiazole            | 18140-74-9 | mineral oil | 99%    |
| 2-isobutyl-3-methoxy-pyrazine | 24683-00-9 | mineral oil | 99%    |
| 2-octanone                    | 111-13-7   | mineral oil | 98%    |
| 3-heptanone                   | 106-35-4   | mineral oil | 98%    |
| 3-nonanone                    | 925-78-0   | mineral oil | 99%    |
| 3-octanone                    | 106-68-3   | mineral oil | 98%    |
| 4,5-dimethylthiazole          | 3581-91-7  | mineral oil | 97%    |
| benzyl alcohol                | 100-51-6   | mineral oil | 99%    |
| butyl acetate                 | 123-86-4   | mineral oil | 99.7%  |
| butyl butyrate                | 109-21-7   | mineral oil | 98%    |
| ethyl butyrate                | 105-54-4   | mineral oil | 99%    |
| hexanal                       | 66-25-1    | mineral oil | 98%    |
| hexyl acetate                 | 142-92-7   | mineral oil | 99%    |
| pentyl acetate                | 628-63-7   | mineral oil | 98%    |
| pentyl propionate             | 674-54-4   | mineral oil | 99%    |
| trans-2-hexenyl acetate       | 2497-18-9  | mineral oil | 98%    |

**Table S2.** The primers used in experiments.

| Primers | Sequences |
|---------|-----------|
|---------|-----------|

|                                       |                                               |
|---------------------------------------|-----------------------------------------------|
| <i>LmigOR3</i> –probe–s<br>(WM–FISH)  | TGCTTCTCCGTGTTCAACTG                          |
| <i>LmigOR3</i> –probe–as<br>(WM–FISH) | TGCACAAACCTGCAAACTTC                          |
| dsOR3–s (RNAi)                        | GGATCCTAATACGACTCACTATAGGTGCTTCTCCGTGTTCAACTG |
| dsOR3–as (RNAi)                       | GGATCCTAATACGACTCACTATAGGAGCACCTTGGTGAAGGTCTG |
| dsGFP–s (RNAi)                        | GGATCCTAATACGACTCACTATAGGCACAAGTTCAGCGTGTCCG  |
| dsGFP–as (RNAi)                       | GGATCCTAATACGACTCACTATAGGGTTCACCTTGATGCCGTTC  |
| qPCR– <i>LmigActin</i> –s             | GCAAAGCTGGCTTCGCCG                            |
| qPCR– <i>LmigActin</i> –as            | ATGTTCTCCTCGGGCGCCAC                          |
| qPCR–dsOR3–s                          | CTCCGAGCTGCTCATCTTCT                          |
| qPCR–dsOR3–as                         | AGCACCTTGGTGAAGGTCTG                          |

<sup>1</sup> Experimental Section: The following PCR protocol was used for WM–FISH: 94 °C for 5 min; 30 cycles of 94 °C for 30 s, 55 °C for 30 s, and 72 °C for 1 min; and 72 °C for 10 min. The annealing temperature of the above procedure was changed to 50 °C to detect the expression levels of GFP and actin. The target fragments of the primers in Table S1 are 374 bp, 731 bp, 420 bp, and 210 bp.

**Table S3.** The formula of solutions used in whole–mounts *in situ* hybridization.

| Solutions                                                                    | Ingredients                                          | Resource                                | Catalog Number |
|------------------------------------------------------------------------------|------------------------------------------------------|-----------------------------------------|----------------|
| 1×Tris–acetate–EDTA                                                          | 0.04mol/L Tris–Base                                  | Sigma, USA                              | V900483–1KG    |
|                                                                              | 0.12%acetic acid                                     | Beijing chemical regents company, China | 10000292       |
|                                                                              | Ethylenediaminetetraacetic acid disodium salt (EDTA) | Sigma, USA                              | 03677          |
| 10×phosphate buffer saline (pH7.1)                                           | 8.5%NaCl                                             | Sinopharm, China                        | 10019392       |
|                                                                              | 14mM KH <sub>2</sub> PO <sub>4</sub>                 | Sigma, USA                              | V900041–500G   |
|                                                                              | 80mM Na <sub>2</sub> HPO <sub>4</sub>                | Sigma, USA                              | V900268–500G   |
| 10×Tris buffered saline(pH7.5)                                               | 1M Tris–Base                                         | Sigma, USA                              | V900483–1KG    |
|                                                                              | 1.5M NaCl                                            | Sinopharm, China                        | 10019392       |
|                                                                              | 100mM Tris–Base                                      | Sigma, USA                              | V900483–1KG    |
| Detection Buffer (DAP)<br>chromogenic detection pH9.5<br>TSA detection pH8.0 | 100mM NaCl                                           | Sinopharm, China                        | 10019392       |
|                                                                              | 50mM MgCl <sub>2</sub> ·6H <sub>2</sub> O            | Sigma, USA                              | V900020–500G   |

|                                                        |                                                                          |                            |              |
|--------------------------------------------------------|--------------------------------------------------------------------------|----------------------------|--------------|
| 20×saline–sodium citrate(pH7.0)                        | 3M NaCl                                                                  | Sinopharm, China           | 10019392     |
|                                                        | 0.3M Na–Citrate                                                          | Sigma, USA                 | V900095–500G |
|                                                        | 4% paraformaldehyde                                                      | Sigma, USA                 | V900894–100G |
| 4% paraformaldehyde solution(pH9.5)                    | 0.1M NaHCO <sub>3</sub>                                                  | Sigma, USA                 | V900182–500G |
|                                                        | 80mM NaHCO <sub>3</sub>                                                  | Sigma, USA                 | V900182–500G |
|                                                        | 120mM Na <sub>2</sub> CO <sub>3</sub>                                    | Sigma, USA                 | S7795–500G   |
| Sodium Carbonate Buffer(pH10.2)                        | 50% Deionized Formamide                                                  | MPBIO, USA                 | FORMD002     |
|                                                        | 5×saline–sodium citrate                                                  |                            |              |
|                                                        | 1% Blot                                                                  | Roche, Switzerland         | 11175041910  |
| Blocking Buffer in Tris buffered saline                | 0.03% Triton X–100                                                       | AMRESCO, USA               | 0694–500ML   |
|                                                        | 1×Tris buffered saline                                                   |                            |              |
|                                                        | 1.5 U/ml anti–digoxigenin alkaline phosphatase conjugated antibody       | Roche, Switzerland         | 11175041910  |
| Alkaline phosphatase solution                          | Blocking Buffer in Tris buffered saline                                  |                            |              |
|                                                        | 1.5 U/ml anti–digoxigenin alkaline phosphatase conjugated antibody       | Roche, Switzerland         | 11175041910  |
|                                                        | 1% anti–biotin streptavidin horse radish peroxidase– conjugated antibody | TSA kit, Perkin Elmer, USA | NEL701A001KT |
| Alkaline phosphatase/ horse radish peroxidase solution | Blocking Buffer in Tris buffered saline                                  |                            |              |
|                                                        | 50% Deionized Formamide                                                  | MPBIO, USA                 | FORMD002     |
|                                                        | 2×saline–sodium citrate                                                  |                            |              |
| Hybridization Buffer                                   | 10% dextran sulphate                                                     | Sigma, USA                 | D8906–50G    |
|                                                        | 20 µg/ml yeast t–RNA                                                     | invitrogen, USA            | AM7119       |
|                                                        | 0.2 mg/ml herring sperm DNA                                              | Sigma, USA                 | D3159–10G    |

|                                                                                                                                        |                                                                                  |                                     |                  |
|----------------------------------------------------------------------------------------------------------------------------------------|----------------------------------------------------------------------------------|-------------------------------------|------------------|
| 2-hydroxy-3-naphtoic<br>acid-2'-phenylanilide phosphate/<br>4-chloro-2-methylbenzenediazon<br>ium hemi-zinc chloride salt<br>substrate | 1% 2-hydroxy-3-naphtoic<br>acid-2'-phenylanilide phosphate<br>(10mg/ml)          | Roche,<br>Switzerlan<br>d           | 11758888001      |
|                                                                                                                                        | 1%<br>4-chloro-2-methylbenzenediazon<br>ium hemi-zinc chloride salt<br>(25mg/ml) | Roche,<br>Switzerlan<br>d           | 11758888001      |
| Tyramide signal amplification<br>substrate                                                                                             | Detection Buffer                                                                 |                                     |                  |
|                                                                                                                                        | 2% fluorescein-tyramides                                                         | TSA kit,<br>Perkin<br>Elmer,<br>USA | NEL701A001K<br>T |
|                                                                                                                                        | Amplification Diluent                                                            | TSA kit,<br>Perkin<br>Elmer,<br>USA | NEL701A001K<br>T |
